# Supplementary material for: Management Strategies and Outcomes for Hyponatremia in Cirrhosis in the Hyponatremia Registry
Source: Hindawi journal article supplement (doi:10.1155/2018/1579508), 2018-09-27
Supplement: f1 [file 1579508.f1.pdf]

**Supplemental Table 1** Clinical characteristics of all cirrhosis patients, including LOS and hospital mortality, based on HN developing in the hospital *vs* admitted to the hospital with HN.

|                                         | Total (n = 595) | At admission (n = 518) | In-hospital (n = 77) |
|-----------------------------------------|-----------------|------------------------|----------------------|
| [Na <sup>+</sup> ], mmol/L <sup>a</sup> | 125.0 (7.0)     | 124.0 (7.0)            | 129.0 (2.0)          |
| BUN, mg/dL <sup>b</sup>                 | 19.0 (17.0)     | 20.0 (19.0)            | 16.0 (14.0)          |
| Cr, mg/dL                               | 1.0 (0.6)       | 1.0 (0.6)              | 0.9 (0.4)            |
| BUN:Cr ratio                            | 18.5 (10.4)     | 18.9 (10.4)            | 16.6 (10.7)          |
| Tbili, μmol/L                           | 4.3 (7.5)       | 4.3 (7.4)              | 4.3 (8.6)            |
| Alb, g/dL                               | 2.5 (0.8)       | 2.5 (0.8)              | 2.4 (0.8)            |
| INR, s                                  | 1.7 (0.6)       | 1.7 (0.6)              | 1.6 (0.7)            |
| Severe Ascites, n (%) <sup>c</sup>      | 321 (54)        | 284 (55)               | 37 (48)              |
| Severe HE, n (%) <sup>c</sup>           | 132 (22)        | 116 (22)               | 16 (21)              |
| C-P Score                               | 11.0 (3.0)      | 11.0 (3)               | 10.0 (3.0)           |
| MELD Score                              | 20.1 (9.6)      | 20.2 (9.7)             | 18.9 (8.2)           |
| MELD-Na Score <sup>b</sup>              | 26.9 (6.4)      | 27.3 (6.3)             | 25.2 (5.8)           |
| LOS, d <sup>a</sup>                     | 7.0             | 6.0                    | 9.0                  |
| Death/Hospice n (%)                     | 61 (10)         | 49 (10)                | 12 (16)              |

<sup>a</sup>*P* <0.001; <sup>b</sup>*P* = 0.01 for hyponatremia (HN) at admission *vs* developing HN in hospital.

<sup>c</sup>Patients with most severe cases.

Values for length of stay (LOS) reported as median; values for sodium concentration ( $[\text{Na}^+]$ ), blood urea nitrogen (BUN), creatinine (Cr), BUN:Cr ratio, total bilirubin (Tbili), albumin (Alb), international normalized ratio (INR), and Child-Pugh (C-P), Model for End Stage Liver Disease (MELD), and MELD-NA scores are median (interquartile range). HE, hepatic encephalopathy.

**Supplemental Table 2** Clinical characteristics of cirrhosis patients admitted with HN based on initial HN therapy.

| Therapy                                  | NST (n = 103) | FR (n = 171) | NS (n = 184) | HS (n = 11)  | TO (n = 27) |
|------------------------------------------|---------------|--------------|--------------|--------------|-------------|
| Initial [Na <sup>+</sup> ],mmol/         | 127.0 (4.0)   | 124.0 (6.0)  | 124.0 (8.0)  | 116.0 (14.0) | 121.0 (7.0) |
| HN severity<br>(mild/moderate/severe), % | 68/27/5       | 37/47/15     | 35/40/26     | 18/18/64     | 22/44/33    |
| BUN, mg/dL                               | 19.0 (19.0)   | 19.0 (17.0)  | 21.0 (20.0)  | 21.0 (49.0)  | 18.0 (17.0) |
| Cr, mg/dL                                | 1.0 (0.6)     | 1.0 (0.6)    | 1.1 (0.8)    | 1.1 (1.4)    | 1.2 (0.5)   |
| BUN:Cr ratio                             | 18.5 (12.2)   | 19.2 (8.9)   | 17.9 (9.8)   | 18.9 (14.4)  | 18.1 (9.7)  |
| Tbili, μmol/L                            | 3.7 (8.1)     | 4.7 (6.8)    | 4.2 (7.7)    | 3.2 (1.8)    | 7.5 (8.0)   |
| Alb, g/dL                                | 2.4 (0.7)     | 2.4 (0.6)    | 2.5 (0.8)    | 2.8 (0.9)    | 2.7 (0.4)   |
| INR, s                                   | 1.6 (0.7)     | 1.7 (0.7)    | 1.6 (0.6)    | 1.6 (1.0)    | 1.7 (0.4)   |
| Severe HE, n (%)                         | 16 (16)       | 37 (22)      | 46 (25)      | 4 (36)       | 6 (22)      |
| Severe Ascites, n (%)                    | 56 (54)       | 101 (59)     | 91 (50)      | 8 (73)       | 15 (56)     |
| C-P Score                                | 10.0 (3.0)    | 11.0 (2.0)   | 10.0 (3.0)   | 11.0 (3.0)   | 12.0 (2.0)  |
| MELD Score                               | 20.3 (10.4)   | 20.0 (8.3)   | 18.9 (10.4)  | 15.3 (14.0)  | 21.3 (5.2)  |

|               |            |            |            |            |            |
|---------------|------------|------------|------------|------------|------------|
| MELD-Na Score | 26.8 (7.4) | 27.3 (6.0) | 26.7 (7.0) | 24.6 (8.8) | 28.3 (3.4) |
|---------------|------------|------------|------------|------------|------------|

Values for initial sodium concentration [Na<sup>+</sup>], blood urea nitrogen (BUN), creatinine (Cr), BUN:Cr ratio, total bilirubin (Tbili), albumin (Alb), international normalized ratio (INR), Child-Pugh (C-P), Model for End-Stage Liver Disease (MELD), and MELD-Na scores are median (interquartile range). *P* <0.05 for *initial [Na<sup>+</sup>]*: no specific therapy (NST) vs fluid restriction (FR), normal saline (NS), hypertonic saline (HS), and tolvaptan (TO), FR vs HS and TO, NS vs HS, and HS vs TO; *Tbili*: NST vs TO; *Alb*: FR vs TO; *INR*: FR vs NS; *severe ascites*: NST vs FR, and FR vs NS; *C-P score*: NST vs FR, FR vs NS, and NS vs TO; HE, hepatic encephalopathy; HN, hyponatremia

**Supplemental Table 3** Outcomes of cirrhosis patients admitted with HN based on initial HN therapy.

| Therapy                                     | NST (n = 103) | FR (n = 171) | NS (n = 184) | HS (n = 11)  | TO (n = 27) |
|---------------------------------------------|---------------|--------------|--------------|--------------|-------------|
| Final [Na <sup>+</sup> ], mmol/L            | 128.0 (7.0)   | 127.0 (7.0)  | 127.0 (7.0)  | 127.0 (10.0) | 130.0 (6.0) |
| Duration, d                                 | 3.0 (3.0)     | 3.0 (3.0)    | 2.0 (2.0)    | 2.0 (2.0)    | 3.0 (2.0)   |
| Rate of [Na <sup>+</sup> ] change, mmol/L/d | 0.5 (1.5)     | 1.0 (2.0)    | 1.6 (3.3)    | 3.5 (5.0)    | 1.8 (1.3)   |
| [Na <sup>+</sup> ] ≥5/<131 mmol/L, %        | 7             | 13           | 22           | 54           | 37          |
| [Na <sup>+</sup> ] <5/>131 mmol/L, %        | 18            | 8            | 6            | 9            | 4           |
| [Na <sup>+</sup> ] ≥5/>131 mmol/L, %        | 21            | 19           | 17           | 18           | 33          |
| Total, %                                    | 46            | 40           | 45           | 81           | 74          |
| Switch therapy, %                           | 29            | 34           | 51           | 18           | 15          |
| Discharge with HN, %                        | 24            | 30           | 8            | 0            | 7           |
| Death/Hospice, %                            | 1             | 0            | 0            | 0            | 0           |
| LOS, d                                      | 7             | 6            | 6            | 8            | 5           |

Values for final  $[Na^+]$ , duration, and rate of change are median (interquartile range).  $P < 0.05$  for  $[Na^+] > 130 \text{ mmol/L}$ : NST vs FR and NS;  $[Na^+] \geq 5 \text{ mmol/L}$ : NST vs NS and TO, FR vs TO, and NS vs TO; and *switch therapy*: NST vs NS, FR vs NS and TO, and NS vs TO. HN, hyponatremia; LOS, length of stay.

**Supplemental Table 4** Second therapy of patients admitted with HN based on initial HN therapy.

| First therapy              |         |         |          |        |        |         |           |
|----------------------------|---------|---------|----------|--------|--------|---------|-----------|
| Secondary therapy, n (%)   | NST     | FR      | NS       | HS     | TO     | Other   | Total     |
| NST                        | 0       | 11 (16) | 30 (22)  | 1 (13) | 0      | 1 (5)   | 43 (16)   |
| FR                         | 21 (54) | 1 (2)   | 76 (57)  | 4 (50) | 5 (71) | 5 (25)  | 112 (41)  |
| NS                         | 14 (36) | 30 (45) | 7 (5)    | 1 (13) | 0      | 3 (15)  | 55 (20)   |
| HS                         | 0       | 2 (3)   | 5 (4)    | 0      | 1 (14) | 2 (10)  | 10 (4)    |
| TO                         | 4 (10)  | 18 (27) | 7 (5)    | 0      | 0      | 5 (25)  | 34 (12)   |
| Other                      | 0       | 5 (7)   | 9 (7)    | 2 (25) | 1 (14) | 4 (20)  | 21 (8)    |
| Total                      | 39 (14) | 67 (24) | 134 (49) | 8 (3)  | 7 (3)  | 20 (7)  | 275 (100) |
| Switched to second therapy | 39 (39) | 67 (39) | 134 (73) | 9 (73) | 7 (26) | 20 (91) | NA        |

**Supplemental Table 5** Clinical characteristics and outcomes of second therapy.

| Second therapy                           | NST (n = 43) | FR (n = 112) | NS (n = 55) | HS (n = 10) | TO (n = 34) |
|------------------------------------------|--------------|--------------|-------------|-------------|-------------|
| Initial [Na <sup>+</sup> ], mmol/L       | 127.0 (4.0)  | 126.0 (7.0)  | 125.0 (5.0) | 117.5 (5.0) | 124.0 (3.0) |
| HN severity<br>(mild/moderate/severe), % | 67/30/2      | 41/38/6      | 38/47/9     | NA/30/70    | 21/62/15    |
| MELD score                               | 21.7 (7.9)   | 20.8 (7.1)   | 21.7 (9.3)  | 14.8 (5.8)  | 21.3 (9.6)  |
| Final [Na <sup>+</sup> ], mmol/L         | 131.0 (4.0)  | 129.0 (7.0)  | 127.0 (7.0) | 127.0 (3.0) | 131.0 (7.0) |
| [Na <sup>+</sup> ] >5/<131 mmol/L, %     | 5            | 9            | 15          | 80          | 12          |
| [Na <sup>+</sup> ] <5/>131 mmol/L, %     | 26           | 8            | 19          | 0           | 3           |
| [Na <sup>+</sup> ] >5/>131 mmol/L, %     | 16           | 18           | 12          | 20          | 55          |
| Total, %                                 | 47           | 35           | 46          | 100         | 70          |
| Total LOS                                | 7.0 (4.0)    | 7.0 (5.0)    | 8.0 (6.0)   | 10.5 (6.0)  | 8.0 (4.0)   |
| LOS after second therapy                 | 5.0 (4.0)    | 6.0 (5.0)    | 5.0 (6.0)   | 8.0 (6.0)   | 6.0 (3.0)   |



Values for initial sodium concentration ( $[Na^+]$ ), Model for End-Stage Liver Disease (MELD) score, final  $[Na^+]$ , total length of stay (LOS), and LOS after second therapy are median (interquartile range).  $P < 0.05$  for *initial  $[Na^+]$* : no specific treatment (NST) vs isotonic saline (NS), hypertonic saline (HS), and tolvaptan (TO), fluid restriction (FR) vs NS, HS, and TO, NS vs HS, and HS vs TO; *final  $[Na^+]$* : NST vs HS and NS, and FR vs NS; and *change from initial  $[Na^+]$* : NST vs HS and TO, FR vs HS and TO, NS vs HS and TO, and HS vs TO. NA, not applicable.
